# Supplementary material for: A process-based modeling of soil organic matter physical properties for land surface models – Part 1: Soil mixture theory
Source: Copernicus journal article supplement (doi:10.5194/egusphere-2025-3262), 2025-07-15
Supplement: Supplementary file [file egusphere-2025-3262-AC1-supplement.pdf]

## Correction Note — Section 2.8

Equation (42) in the originally submitted manuscript was incorrect. The corrected form is provided here for consistency and clarity.

**Previous incorrect equation (old Eq. 42):**

$$C_{sv} = [C_{som} f_{vom} + C_{sms} (1 - f_{vom})] (1 - w_{sat})$$

**Corrected equation (new Eq. 46):**

$$C_{sv} = [C_{som} f_{vom}^s + C_{sms} (1 - f_{vom}^s)] (1 - w_{sat})$$

Here,  $f_{vom}^s$  denotes the volumetric fraction of SOM within the soil solid phase (Balland and Arp, 2005; Cuynet et al., 2025). This correction aligns the notation with the derivation presented in the revised text and supports the equation actually used in the manuscript (old Eq. 41, now Eq. 45):

$$C_{sv} = c_{om} \rho_{b_{om}} f_{vom} + c_{ms} \rho_{b_{ms}} (1 - f_{vom})$$

This change has no effect on numerical results, figures, or conclusions. More details can be found in the new Section 2.8. Finally, on line 554 of the previous manuscript, the text will be updated to read: “Assuming  $C_{sv}$  ( $\text{J} \cdot \text{m}^{-3} \cdot \text{K}^{-1}$ ) can be independently estimated from Equation (45)” instead of “Equation (41)”.

The new Section 2.8 can be found on the next page.

### References

### References

- Balland, V. and Arp, P. A.: Modeling soil thermal conductivities over a wide range of conditions, *Journal of Environmental Engineering and Science*, **4**, 549–558, [doi:10.1139/s05-007](https://doi.org/10.1139/s05-007), 2005.
- Cuynet, A., Salmon, E., Lopéz-Blanco, E., Goeckede, M., Ikawa, H., Kobayashi, H., Lohila, A., and Ottlé, C.: Enhanced prescription of soil organic and mineral content in the ORCHIDEE LSM to better simulate soil temperatures: application at nine high-latitude GEM and FLUXNET sites, [doi:10.22541/au.173748260.01626603/v1](https://doi.org/10.22541/au.173748260.01626603/v1), 2025.

## 2.2.8 SOM thermal properties

Although the impact of soil organic matter on thermal processes is not the primary focus of this study, we briefly review a physically consistent approach to represent it within LSMs, as it complements the broader treatment of SOM hydrodynamics presented here. In LSMs, soil heat transport is typically described by the one-dimensional heat diffusion equation, derived from Fourier's law:

$$C_{soil} \frac{\partial T}{\partial t} = \frac{\partial}{\partial z} \left( \lambda_{soil} \frac{\partial T}{\partial z} \right) \quad (37)$$

where  $C_{soil}$  is the volumetric heat capacity of the soil ( $\text{J.m}^{-3}.\text{K}^{-1}$ ),  $\lambda_{soil}$  the soil thermal conductivity ( $\text{W.m}^{-1}.\text{K}^{-1}$ ),  $T$  the soil temperature (K),  $t$  the time (s), and  $z$  the soil depth (m).

In many LSMs, the thermal conductivity  $\lambda_{soil}$  is computed using a combination of dry and saturated soil conductivities, weighted by the Kersten number, which reflects the degree of saturation of each soil layer (Johansen, 1977; Farouki, 1981; Peters-Lidard et al., 1998). Within this framework, the saturated thermal conductivity is calculated as a volumetric-weighted geometric mean of the thermal conductivities of the solid phase, liquid water, and ice. Lawrence and Slater (2008) or Decharme et al. (2016) proposed that the dry conductivity ( $\lambda_{dry}$ ) and the solid-phase conductivity ( $\lambda_s$ ) be calculated using arithmetic or geometric mixing, respectively, based on the volumetric fractions of the organic and mineral components. The corresponding conductivity values for the organic domain can be taken from Table S1 in the Supplement, while mineral values can be taken from Peters-Lidard et al. (1998) as mentioned in section 2.1.2. In the present study, we focus exclusively on  $\lambda_{dry}$  and show that the geo-harmonic mean also provides a suitable alternative, while the computation of  $\lambda_s$  is addressed in the companion paper to this work.

The total volumetric heat capacity of soil,  $C_{soil}$ , can be derived from its fundamental physical definition, expressed as the heat capacity per unit volume of bulk soil:

$$C_{soil} = \frac{1}{v_b} \sum_k m_k c_k \quad (38)$$

where  $v_b$  is the total soil volume, and  $m_k$  (kg) and  $c_k$  ( $\text{J.kg}^{-1}.\text{K}^{-1}$ ) denote the mass and specific heat capacity of each soil constituent  $k$ , including the solid matrix, liquid water, ice, and air. Assuming that air has negligible heat capacity compared to other phases, its contribution can be ignored. Grounding into the soil mixture theory and substituting the contributions of each relevant phase (organic matter, mineral matter, liquid water, and ice) into Equation (38), the total volumetric heat capacity becomes:

$$C_{soil} = \frac{1}{v_b} (m_{om} c_{om} + m_{ms} c_{ms} + m_w c_w + m_i c_i) \quad (39)$$

where  $m_{om}$  and  $m_{ms}$  (kg) are the masses of organic and mineral solids,  $m_w$  and  $m_i$  (kg) the masses of liquid water and ice,  $c_{om}$ ,  $c_{ms}$ ,  $c_w$ , and  $c_i$  ( $\text{J.kg}^{-1}.\text{K}^{-1}$ ) their respective specific heat capacities. Each term in the summation of Equation (39) can be decomposed as the product of a mass concentration (mass per unit volume of the constituent's domain) and the corresponding

volume fraction within the bulk soil. This leads to the following equivalent formulation:

$$C_{soil} = c_{om} \frac{m_{om}}{v_{om}} \frac{v_{om}}{v_b} + c_{ms} \frac{m_{ms}}{v_{ms}} \frac{v_{ms}}{v_b} + c_w \frac{m_w}{v_w} \frac{v_w}{v_b} + c_i \frac{m_i}{v_i} \frac{v_i}{v_b} \quad (40)$$

490 where  $v_k$  ( $\text{m}^3$ ) denotes the volume of each soil constituent, with liquid water and ice occupying the pore space, and organic matter and mineral substrate forming the soil solid. For liquid water and ice, the ratios  $m_w/v_w$  and  $m_i/v_i$  are simply their specific densities,  $\rho_w$  and  $\rho_i$  ( $\text{kg}\cdot\text{m}^{-3}$ ), and the ratios  $v_w/v_b$  and  $v_i/v_b$  correspond to their volumetric contents,  $w_w$  and  $w_i$  ( $\text{m}^3\cdot\text{m}^{-3}$ ), respectively. For the solid constituents,  $v_{om}$  and  $v_{ms}$  correspond to the volumes of organic matter and mineral substrate within the soil solid, i.e.  $v_{om} = v_{s_{om}}$  and  $v_{ms} = v_{s_{ms}}$ . Consequently, in Equation (40),  $m_{om}/v_{om} = m_{om}/v_{s_{om}}$  and  $m_{ms}/v_{ms} = m_{ms}/v_{s_{ms}}$  are simply their solid densities,  $\rho_{s_{om}}$  and  $\rho_{s_{ms}}$ , as defined by Equation (13b). The computation of the ratios  $v_{s_{om}}/v_b$  and  $v_{s_{ms}}/v_b$  is less trivial, but they can be expressed as the product of their respective solid-phase volumetric fractions,  $v_{s_{om}}/v_s = f_{v_{om}}^s$  and  $v_{s_{ms}}/v_s = (1 - f_{v_{om}}^s)$  (inferred via Equation 12b), and the fraction of solids in the bulk soil,  $v_s/v_b = (1 - w_{sat})$  (inferred via Equation 10). Substituting these relationships into Equation (40) leads to the following formulation for the total volumetric heat capacity  $C_{soil}$  expressed as an arithmetic mean of the product of density and specific

500 heat capacity of each soil constituent :

$$C_{soil} = C_{s_v} + C_w + C_i \quad \text{with} \quad \begin{cases} C_{s_v} = [c_{om} \rho_{s_{om}} f_{v_{om}}^s + c_{ms} \rho_{s_{ms}} (1 - f_{v_{om}}^s)] (1 - w_{sat}) \\ C_w = c_w \rho_w w_l \\ C_i = c_i \rho_i w_i \end{cases} \quad (41)$$

Here,  $C_{s_v}$  ( $\text{J}\cdot\text{m}^{-3}\cdot\text{K}^{-1}$ ) is the volumetric heat capacity of the dry solid matrix, while  $C_w$  and  $C_i$  represent the contributions of the liquid water and ice phases, respectively. As with porosity, Equation (41) supports the use of an arithmetic mixing formulation, as adopted by Lawrence and Slater (2008) and most LSMs, to compute the volumetric heat capacity of the dry

505 soil matrix.

In Equation (41), the appropriate quantity to use is the volumetric fraction of SOM within the soil solid phase ( $f_{v_{om}}^s$ ), consistent with previous findings (Balland and Arp, 2005; Cuynet et al., 2025), rather than the volumetric fraction of SOM in the bulk soil ( $f_{v_{om}}$ ) as commonly assumed in earlier LSM parameterizations. Consistently with Equation (22),  $f_{v_{om}}^s$  ( $\text{m}^3\cdot\text{m}^{-3}$ ) is defined as the ratio between the SOM density in the soil solid, expressed as the SOM mass fraction ( $f_{m_{om}}$ ) relative to the

510 soil particle density ( $\rho_s$ ), and the SOM particle density ( $\rho_{s_{om}}$ ):

$$f_{v_{om}}^s = \frac{f_{m_{om}} \rho_s}{\rho_{s_{om}}} \quad (42)$$

$\rho_{s_{om}}$  can be related to its bulk density  $\rho_{b_{om}}$  and porosity  $w_{sat_{om}}$  via Equation (19):

$$\rho_{s_{om}} = \frac{\rho_{b_{om}}}{1 - w_{sat_{om}}} \quad (43)$$

As  $\rho_s$  is related to  $\rho_b$  through the soil porosity ( $w_{sat}$ ), replacing  $\rho_s$  and  $\rho_{s_{om}}$  using Equations (11) and (43) in Equation (42) leads to the following relationship between  $f_{v_{om}}^s$  and  $f_{v_{om}}$ :

515

$$f_{v_{om}}^s = f_{v_{om}} \frac{1 - w_{sat_{om}}}{1 - w_{sat}} \quad (44)$$

This relationship shows that  $f_{v_{om}}^s$  can be readily obtained from  $f_{v_{om}}$ . Furthermore, substituting Equations (42) and (44) into Equation (41) and applying the complement of Equation (18) with respect to unity (i.e.  $1 - w_{sat} = f_{v_{om}}(1 - w_{sat_{om}}) + (1 - f_{v_{om}})(1 - w_{sat_{ms}})$ ), the volumetric heat capacity of the dry soil matrix can be expressed directly in terms of the bulk densities and volumetric fractions of the organic and mineral domains:

$$C_{s_v} = c_{om} \rho_{b_{om}} f_{v_{om}} + c_{ms} \rho_{b_{ms}} (1 - f_{v_{om}}) \quad (45)$$

Equation (45) may, in some cases, be more straightforward to apply than Equation (41), provided that the bulk densities of each constituent are known.

A more usual form of  $C_{s_v}$  currently used in LSMs can be derived from Equation (41) using solid heat capacities for each soil component :

$$C_{s_v} = [C_{s_{om}} f_{v_{om}}^s + C_{s_{ms}} (1 - f_{v_{om}}^s)] (1 - w_{sat}) \quad \text{with} \quad \begin{cases} C_{s_{om}} = c_{om} \rho_{s_{om}} \\ C_{s_{ms}} = c_{ms} \rho_{s_{ms}} \end{cases} \quad (46)$$

where  $C_{s_{om}}$  and  $C_{s_{ms}}$  ( $\text{J.m}^{-3}.\text{K}^{-1}$ ) are the soil solid heat capacity for organic matter and mineral substance, which can be specified as in [Lawrence and Slater \(2008\)](#) from a lookup table (see Table S1 in the Supplement) or as in the proposed framework from their specific heat capacities and particle densities. Following [Peters-Lidard et al. \(1998\)](#), and based on the average values reported in [Farouki \(1981\)](#), we adopt  $c_{ms} = 733 \text{ J.kg}^{-1}.\text{K}^{-1}$  for mineral matter and  $c_{om} = 1972 \text{ J.kg}^{-1}.\text{K}^{-1}$  for organic matter. The particle density of mineral solids ( $\rho_{s_{ms}}$ ) can be estimated using the PTF from [Ruehlmann \(2020\)](#) (Equation 25). For organic matter, the particle density  $\rho_{s_{om}}$  can be computed using Equation (43). Finally, the total soil porosity,  $w_{sat}$ , can be computed via arithmetic mixing using the PTF from [Liu and Lennartz \(2019\)](#) for the organic matter domain (Equation 30), and, for instance, the PTF from [Cosby et al. \(1984\)](#) for the mineral soil. This approach ensures physical consistency between the volumetric heat capacity of the dry soil matrix, total soil porosity, and the particle densities of each solid soil component.

**Table 1.** Summary of the proposed framework, including the steps to derive the "true" soil organic volumetric fraction, the PTFs used to compute SOM hydraulic properties for the [Brooks and Corey \(1964\)](#) model, and the mixing rules applied to combine organic and mineral contributions into bulk soil properties. The framework relies on a limited set of input data commonly available in all current regional and global soil databases: the soil organic carbon mass fraction ( $f_{moc}$ ), the dry bulk density of the fine earth, and the mass fractions of clay ( $f_{m_{clay}}$ ), sand ( $f_{m_{sand}}$ ), and silt ( $f_{m_{silt}}$ ). In this study, the hydraulic properties of the mineral domain ( $w_{sat_{ms}}$ ,  $b_{ms}$ ,  $\psi_{sat_{ms}}$ ,  $k_{sat_{ms}}$ ) are taken from the texture-based pedotransfer functions of [Cosby et al. \(1984\)](#). The dry thermal conductivity of the mineral domain can be estimated using the approach proposed by [Peters-Lidard et al. \(1998\)](#).

| Process                                 | Compute                               | Formula / Method                                                                                                                                                                                                             | Ref.      |
|-----------------------------------------|---------------------------------------|------------------------------------------------------------------------------------------------------------------------------------------------------------------------------------------------------------------------------|-----------|
| <b>Soil organic volumetric fraction</b> | 1) SOM mass fraction from SOC         | $f_{m_{om}} = \min[1, 1.848 f_{moc}^{0.967}]$ ( <a href="#">Ruehlmann, 2020</a> )                                                                                                                                            | Eq. (28)  |
|                                         | 2) Particle density of mineral domain | $\rho_{s_{ms}} = \left( \frac{f_{m_{clay}}}{\rho_{clay}^{(a)}} + \frac{f_{m_{silt}}}{\rho_{silt}^{(b)}} + \frac{f_{m_{sand}}}{\rho_{sand}^{(c)}} \right)^{-1}$ ( <a href="#">Ruehlmann, 2020</a> )                           | Eq. (25)  |
|                                         | 3) Bulk density of mineral domain     | $\rho_{b_{ms}} = (1 - w_{sat_{ms}}) \rho_{s_{ms}}$                                                                                                                                                                           | Eq. (24)  |
|                                         | 4) Bulk density of organic domain     | $\rho_{b_{om}} = f_{m_{om}} \left( \frac{1}{\rho_b} - \frac{1 - f_{m_{om}}}{\rho_{b_{ms}}} \right)^{-1}$                                                                                                                     | Eq. (23)  |
|                                         | 5) Bulk SOM volumetric fraction       | $f_{v_{om}} = f_{m_{om}} \rho_b / \rho_{b_{om}}$                                                                                                                                                                             | Eq. (22)  |
|                                         | 6) Specific SOM volumetric fraction   | $f_{v_{om}}^s = f_{m_{om}} \rho_s / \rho_{s_{om}} = f_{v_{om}} (1 - w_{sat_{om}}) / (1 - w_{sat})$                                                                                                                           | Eq. (44)  |
| <b>Soil hydrology of SOM domain</b>     | 7) SOM porosity                       | $w_{sat_{om}} = 0.95 - 0.437 r_{b_{om}}^{(d)}$ ( <a href="#">Liu and Lennartz, 2019</a> )                                                                                                                                    | Eq. (30)  |
|                                         | 8) SOM particle density               | $\rho_{s_{om}} = \rho_{b_{om}} / (1 - w_{sat_{om}})$                                                                                                                                                                         | Eq. (43)  |
|                                         | 9) SOM pore-size index                | $b_{om} = 2.933 + 0.442 r_{b_{om}}^{0.463} + e^{(1.321 r_{b_{om}})}$                                                                                                                                                         | Eq. (34a) |
|                                         | 10) SOM air-entry potential           | $\psi_{sat_{om}} = (101.663 r_{b_{om}}^4 - 46.913 r_{b_{om}}^5 - 61.625 r_{b_{om}}^{2.635}) 0.0168^{r_{b_{om}}}$                                                                                                             | Eq. (34b) |
|                                         | 11) SOM saturated conductivity        | $\log_{10}(k_{sat_{om}}) = -7.955 - 1.89 \log_{10}(z^* + 0.068) - 2.96 \log_{10}(r_{b_{om}}^* + 0.045)$                                                                                                                      | Eq. (36)  |
| <b>Total soil</b>                       | 12) Soil porosity                     | $w_{sat} = f_{v_{om}} w_{sat_{om}} + (1 - f_{v_{om}}) w_{sat_{ms}}$                                                                                                                                                          | Eq. (18)  |
|                                         | 13) Soil pore-size index              | $b = f_{v_{om}} b_{om} + (1 - f_{v_{om}}) b_{ms}$                                                                                                                                                                            | Eq. (4)   |
|                                         | 14) Soil air-entry potential          | $\psi_{sat} = f_{v_{om}} \psi_{sat_{om}} + (1 - f_{v_{om}}) \psi_{sat_{ms}}$                                                                                                                                                 | Eq. (4)   |
|                                         | 15) Soil saturated conductivity       | $k_{sat} = (k_{sat_{om}})^{f_{v_{om}}} (k_{sat_{ms}})^{1-f_{v_{om}}}$                                                                                                                                                        | Eq. (5)   |
|                                         | 16) Soil volumetric heat capacity     | $C_{sv} = [c_{om}^{(e)} \rho_{s_{om}} f_{v_{om}}^s + c_{ms}^{(f)} \rho_{s_{ms}} (1 - f_{v_{om}}^s)] (1 - w_{sat})$                                                                                                           | Eq. (41)  |
|                                         | 17) Dry thermal conductivity          | $\lambda_{dry} = \left[ \frac{\sqrt{\lambda_{dry_{om}}^{(g)}} \lambda_{dry_{ms}}}{(1 - f_{v_{om}}) \sqrt{\lambda_{dry_{om}} + f_{v_{om}} \sqrt{\lambda_{dry_{ms}}}}} \right]^2$ ( <a href="#">Nielson and Rogers, 1982</a> ) | Eq. (7)   |

<sup>(a)</sup>  $\rho_{clay} = 2761 \text{ kg.m}^{-3}$ , <sup>(b)</sup>  $\rho_{sand} = 2656 \text{ kg.m}^{-3}$ , <sup>(c)</sup>  $\rho_{silt} = 2692 \text{ kg.m}^{-3}$ , <sup>(d)</sup>  $r_{b_{om}} = \rho_{b_{om}} / 1000$ , <sup>(e)</sup>  $c_{om} = 1972 \text{ J.kg}^{-1}.\text{K}^{-1}$ , <sup>(f)</sup>  $c_{ms} = 733 \text{ J.kg}^{-1}.\text{K}^{-1}$ , <sup>(g)</sup>  $\lambda_{dry_{om}} = 0.05 \text{ W.m}^{-1}.\text{K}^{-1}$

## 2.2.8 SOM thermal properties

Although the impact of soil organic matter on thermal processes is not the primary focus of this study, we briefly review a physically consistent approach to represent it within LSMs, as it complements the broader treatment of SOM hydrodynamics presented here. In LSMs, soil heat transport is typically described by the one-dimensional heat diffusion equation, derived from Fourier's law:

$$C_{soil} \frac{\partial T}{\partial t} = \frac{\partial}{\partial z} \left( \lambda_{soil} \frac{\partial T}{\partial z} \right) \quad (37)$$

where  $C_{soil}$  is the volumetric heat capacity of the soil ( $\text{J.m}^{-3}.\text{K}^{-1}$ ),  $\lambda_{soil}$  the soil thermal conductivity ( $\text{W.m}^{-1}.\text{K}^{-1}$ ),  $T$  the soil temperature (K),  $t$  the time (s), and  $z$  the soil depth (m).

In many LSMs, the thermal conductivity  $\lambda_{soil}$  is computed using a combination of dry and saturated soil conductivities, weighted by the Kersten number, which reflects the degree of saturation of each soil layer (Johansen, 1977; Farouki, 1981; Peters-Lidard et al., 1998). Within this framework, the saturated thermal conductivity is calculated as a volumetric-weighted geometric mean of the thermal conductivities of the solid phase, liquid water, and ice. Following Lawrence and Slater (2008) or Decharme et al. (2016), both proposed that the dry conductivity ( $\lambda_{dry}$ ) and the solid-phase conductivity ( $\lambda_s$ ) can be computed using arithmetic or geometric mixing, respectively, based on the volumetric fractions of the organic and mineral components. The corresponding conductivity values for the organic domain can be taken from Table S1 in the Supplement, while mineral values can be taken from Peters-Lidard et al. (1998) as mentioned in section 2.1.2. In this the present study, we also focus exclusively on  $\lambda_{dry}$  and show that the geo-harmonic mean can be also provides a suitable alternative, while the computation of  $\lambda_s$  is addressed in the companion paper to this work.

The total volumetric heat capacity of soil,  $C_{soil}$ , can be derived from its fundamental physical definition, expressed as the heat capacity per unit volume of bulk soil:

$$C_{soil} = \frac{1}{v_b} \sum_k m_k c_k \quad (38)$$

where  $v_b$  is the total soil volume, and  $m_k$  (kg) and  $c_k$  ( $\text{J.kg}^{-1}.\text{K}^{-1}$ ) denote the mass and specific heat capacity of each soil constituent  $k$ , including the solid matrix, liquid water, ice, and air. Assuming that air has negligible heat capacity compared to other phases, its contribution can be ignored. Grounding into the soil mixture theory and substituting the contributions of each relevant phase (organic matter, mineral matter, liquid water, and ice) into Equation (38), the total volumetric heat capacity becomes:

$$C_{soil} = \frac{1}{v_b} (m_{om} c_{om} + m_{ms} c_{ms} + m_w c_w + m_i c_i) \quad (39)$$

where  $m_{om}$  and  $m_{ms}$  (kg) are the masses of organic and mineral solids,  $m_w$  and  $m_i$  (kg) the masses of liquid water and ice,  $c_{om}$ ,  $c_{ms}$ ,  $c_w$ , and  $c_i$  ( $\text{J.kg}^{-1}.\text{K}^{-1}$ ) their respective specific heat capacities. Each term in the summation of Equation (39) can be decomposed as the product of a mass concentration (mass per unit volume of the constituent's domain) and the corresponding

volume fraction within the bulk soil. This leads to the following equivalent formulation:

$$C_{soil} = c_{om} \frac{m_{om}}{v_{b_{om}}} \frac{m_{om}}{v_{om}} \frac{v_{b_{om}}}{v_b} \frac{v_{om}}{v_b} + c_{ms} \frac{m_{ms}}{v_{b_{ms}}} \frac{m_{ms}}{v_{ms}} \frac{v_{b_{ms}}}{v_b} \frac{v_{ms}}{v_b} + c_w \frac{m_w}{v_{b_w}} \frac{m_w}{v_w} \frac{v_{b_w}}{v_b} \frac{v_w}{v_b} + c_i \frac{m_i}{v_{b_i}} \frac{m_i}{v_i} \frac{v_{b_i}}{v_b} \frac{v_i}{v_b} \quad (40)$$

490 where  $v_{b_w}$  and  $v_{b_i}$  ( $m^3$ ) are the bulk volumes occupied by the liquid water and ice in the soil. Each component's contribution is thus expressed as the product of its phase-specific density, its volumetric proportion within the soil, occupying the pore space, and organic matter and mineral substrate forming the soil solid. For liquid water and ice, the ratios  $m_w/v_w$  and its specific heat capacity. This formulation makes explicit the structure of the soil mixture and reflects the mass-volume consistency underlying the mixture theory. In line with this theory, and recognizing for  
495 each soil constituent  $m_i/v_i$  are simply their specific densities,  $\rho_w$  and  $\rho_i$  ( $kg \cdot m^{-3}$ ), and the ratios  $v_w/v_b$  and  $v_i/v_b$  correspond to their volumetric contents,  $w_w$  and  $w_i$  ( $m^3 \cdot m^{-3}$ ), respectively. For the solid constituents,  $v_{om}$  and  $v_{ms}$  correspond to the volumes of organic matter and mineral substrate within the soil solid, i.e.  $v_{om} = v_{s_{om}}$  and  $v_{ms} = v_{s_{ms}}$ . Consequently, in Equation (40) the definitions of the phase-specific densities ( $\rho_{b_k} = m_k/v_{b_k}$ ) and their volumetric fractions ( $f_{v_k} = v_{b_k}/v_b$ ) or content ( $w_k = v_{b_k}/v_b$ ),  $m_{om}/v_{om} = m_{om}/v_{s_{om}}$  and  $m_{ms}/v_{ms} = m_{ms}/v_{s_{ms}}$  are simply their solid densities,  $\rho_{s_{om}}$  and  $\rho_{s_{ms}}$ ,  
500 as defined by Equation (13b). The computation of the ratios  $v_{s_{om}}/v_b$  and  $v_{s_{ms}}/v_b$  is less trivial, but they can be expressed as the product of their respective solid-phase volumetric fractions,  $v_{s_{om}}/v_s = f_{v_{om}}^s$  and  $v_{s_{ms}}/v_s = (1 - f_{v_{om}}^s)$  (inferred via Equation 12b), and the fraction of solids in the bulk soil,  $v_s/v_b = (1 - w_{sat})$  (inferred via Equation 10). Substituting these relationships into Equation (40) leads to the following formulation for the total volumetric heat capacity  $C_{soil}$  can be expressed as an arithmetic mean of the product of density and specific heat capacity of each soil constituent, as proposed by Farouki (1981):

$$505 \quad C_{soil} = C_{s_v} + C_w + C_i \quad \text{with} \quad \begin{cases} C_{s_v} = [c_{om} \rho_{s_{om}} f_{v_{om}}^s + c_{ms} \rho_{s_{ms}} (1 - f_{v_{om}}^s)] (1 - w_{sat}) \\ C_w = c_w \rho_w w_l \\ C_i = c_i \rho_i w_i \end{cases} \quad (41)$$

Here,  $C_{s_v}$  ( $J \cdot m^{-3} \cdot K^{-1}$ ) is the volumetric heat capacity of the dry solid matrix, while  $C_w$  and  $C_i$  represent the contributions of the liquid water and ice phases, respectively. The variables  $w_l$  and  $w_i$  ( $m^3 \cdot m^{-3}$ ) are the volumetric contents of liquid water and ice. As with porosity, Equation (41) supports the use of an arithmetic mixing formulation, as adopted by Lawrence and Slater (2008) and most land surface models (LSMs) LSMs, to compute the volumetric heat capacity of the dry soil matrix.

510 A more usual form of  $C_{s_v}$  can be derived from Equation (41) using In Equation (41), the appropriate quantity to use is the volumetric fraction of SOM within the soil solid phase ( $f_{v_{om}}^s$ ), consistent with previous findings (Balland and Arp, 2005; Cuyet et al., 2022), rather than the volumetric fraction of SOM in the bulk soil ( $f_{v_{om}}$ ) as commonly assumed in earlier LSM parameterizations. Consistently with Equation (22),  $f_{v_{om}}^s$  ( $m^3 \cdot m^{-3}$ ) is defined as the ratio between the SOM density in the soil solid, expressed as the SOM mass fraction ( $f_{m_{om}}$ ) relative to the soil particle density ( $\rho_s$ ), and the SOM particle density ( $\rho_{s_{om}}$ ):

$$515 \quad f_{v_{om}}^s = \frac{f_{m_{om}} \rho_s}{\rho_{s_{om}}} \quad (42)$$

$\rho_{som}$  can be related to its bulk density  $\rho_{b_{om}}$  and porosity  $w_{sat_{om}}$  via Equation (19):

$$\rho_{s_{om}} = \frac{\rho_{b_{om}}}{1 - w_{sat_{om}}} \quad (43)$$

As  $\rho_s$  is related to  $\rho_b$  through the soil porosity ( $w_{sat}$ ), replacing  $\rho_s$  and  $\rho_{som}$  using Equations (11) and (43) in Equation (42) leads to the following relationship between  $f_{v_{om}}^s$  and  $f_{v_{ov}}$ :

$$f_{v_{om}}^s = f_{v_{om}} \frac{1 - w_{sat_{om}}}{1 - w_{sat}} \quad (44)$$

This relationship shows that  $f_{v_{om}}^s$  can be readily obtained from  $f_{v_{ov}}$ . Furthermore, substituting Equations (42) and (44) into Equation (41) and applying the complement of Equation (18) with respect to unity (i.e.  $1 - w_{sat} = f_{v_{om}}(1 - w_{sat_{om}}) + (1 - f_{v_{ov}})(1 - w_{sat})$ ) the volumetric heat capacity of the dry soil matrix can be expressed directly in terms of the bulk densities and volumetric fractions of the organic and mineral particle densities (Equation 19), which is domains:

$$C_{s_v} = c_{om} \rho_{b_{om}} f_{v_{om}} + c_{ms} \rho_{b_{ms}} (1 - f_{v_{om}}) \quad (45)$$

Equation (45) may, in some cases, be more straightforward to apply than Equation (41), provided that the bulk densities of each constituent are known.

A more usual form of  $C_{s_v}$  currently used in LSMs can be derived from Equation (41) using solid heat capacities for each soil component :

$$C_{s_v} = \left[ C_{s_{om}} f_{v_{om}}^s + C_{s_{ms}} (1 - f_{v_{om}}^s) \right] (1 - w_{sat}) \quad \text{with} \quad \begin{cases} C_{s_{om}} = c_{om} \rho_{s_{om}} \\ C_{s_{ms}} = c_{ms} \rho_{s_{ms}} \end{cases} \quad (46)$$

where  $C_{s_{om}}$  and  $C_{s_{ms}}$  ( $\text{J.m}^{-3}.\text{K}^{-1}$ ) are the soil solid heat capacity for organic matter and mineral substance, which can be specified as in Lawrence and Slater (2008) from a lookup table (see Table S1 in the Supplement) or as in the proposed framework from their specific heat capacities and particle densities. Following Peters-Lidard et al. (1998), and based on the average values reported in Farouki (1981), we adopt  $c_{ms} = 733 \text{ J.kg}^{-1}.\text{K}^{-1}$  for mineral matter and  $c_{om} = 1972 \text{ J.kg}^{-1}.\text{K}^{-1}$  for organic matter. The particle density of mineral solids ( $\rho_{s_{ms}}$ ) can be estimated using the PTF from Ruehlmann (2020) (Equation 25). For organic matter, the particle density  $\rho_{s_{om}}$  can be computed from  $\rho_{b_{om}}$  and  $w_{sat_{om}}$  using Equation (19):

$$\rho_{s_{om}} = \frac{\rho_{b_{om}}}{(1 - w_{sat_{om}})}$$

using Equation (43). Finally, the total soil porosity,  $w_{sat}$ , can be computed via arithmetic mixing using the PTF from Liu and Lennartz (2019) for the organic matter domain (Equation 30), and, for instance, the PTF from Cosby et al. (1984) for the mineral soil. This approach ensures physical consistency between the volumetric heat capacity of the dry soil matrix, total soil porosity, and the particle densities of each solid soil component.



**Table 1.** Summary of the proposed framework, including the steps to derive the "true" soil organic volumetric fraction, the PTFs used to compute SOM hydraulic properties for the [Brooks and Corey \(1964\)](#) model, and the mixing rules applied to combine organic and mineral contributions into bulk soil properties. The framework relies on a limited set of input data commonly available in all current regional and global soil databases: the soil organic carbon mass fraction ( $f_{moc}$ ), the dry bulk density of the fine earth, and the mass fractions of clay ( $f_{m_{clay}}$ ), sand ( $f_{m_{sand}}$ ), and silt ( $f_{m_{silt}}$ ). In this study, the hydraulic properties of the mineral domain ( $w_{sat_{ms}}$ ,  $b_{ms}$ ,  $\psi_{sat_{ms}}$ ,  $k_{sat_{ms}}$ ) are taken from the texture-based pedotransfer functions of [Cosby et al. \(1984\)](#). ~~Thermal conductivities~~ The dry thermal conductivity of the mineral domain can be estimated using the approach proposed by [Peters-Lidard et al. \(1998\)](#).

| Process                                 | Compute                                                        | Formula / Method                                                                                                                                                                                                         | Ref.             |
|-----------------------------------------|----------------------------------------------------------------|--------------------------------------------------------------------------------------------------------------------------------------------------------------------------------------------------------------------------|------------------|
| <b>Soil organic volumetric fraction</b> | 1) SOM mass fraction from SOC                                  | $f_{mom} = \min[1, 1.848 f_{moc}^{0.967}]$ ( <a href="#">Ruehlmann, 2020</a> )                                                                                                                                           | Eq. (28)         |
|                                         | 2) Particle density of mineral domain                          | $\rho_{s_{ms}} = \left( \frac{f_{m_{clay}}}{\rho_{clay}^{(a)}} + \frac{f_{m_{silt}}}{\rho_{silt}^{(b)}} + \frac{f_{m_{sand}}}{\rho_{sand}^{(c)}} \right)^{-1}$ ( <a href="#">Ruehlmann, 2020</a> )                       | Eq. (25)         |
|                                         | 3) Bulk density of mineral domain                              | $\rho_{b_{ms}} = (1 - w_{sat_{ms}}) \rho_{s_{ms}}$                                                                                                                                                                       | Eq. (24)         |
|                                         | 4) Bulk density of organic domain                              | $\rho_{b_{om}} = f_{mom} \left( \frac{1}{\rho_b} - \frac{1 - f_{mom}}{\rho_{b_{ms}}} \right)^{-1}$                                                                                                                       | Eq. (23)         |
|                                         | 5) <del>Soil organic</del> <u>Bulk SOM</u> volumetric fraction | $f_{vom} = f_{mom} \rho_b / \rho_{b_{om}}$                                                                                                                                                                               | Eq. (22)         |
|                                         | 6) <u>Specific SOM volumetric fraction</u>                     | $f_{vom}^s = f_{vom} \rho_s / \rho_{s_{om}} = f_{vom} (1 - w_{sat_{om}}) / (1 - w_{sat})$                                                                                                                                | Eq. (44)         |
| <b>Soil hydrology of SOM domain</b>     | 67) SOM porosity                                               | $w_{sat_{om}} = 0.95 - 0.437 r_{b_{om}}^{(d)}$ ( <a href="#">Liu and Lennartz, 2019</a> )                                                                                                                                | Eq. (30)         |
|                                         | 78) SOM particle density                                       | $\rho_{s_{om}} = \rho_{b_{om}} / (1 - w_{sat_{om}})$                                                                                                                                                                     | Eq. (43)         |
|                                         | 89) SOM pore-size index                                        | $b_{om} = 2.933 + 0.442 r_{b_{om}}^{0.463} + e^{(1.321 r_{b_{om}})}$                                                                                                                                                     | Eq. (34a)        |
|                                         | 910) SOM air-entry potential                                   | $\psi_{sat_{om}} = (101.663 r_{b_{om}}^4 - 46.913 r_{b_{om}}^5 - 61.625 r_{b_{om}}^{2.635}) 0.0168^{r_{b_{om}}}$                                                                                                         | Eq. (34b)        |
|                                         | 101) SOM saturated conductivity                                | $\log_{10}(k_{sat_{om}}) = -7.955 - 1.89 \log_{10}(z^* + 0.068) - 2.96 \log_{10}(r_{b_{om}}^* + 0.045)$                                                                                                                  | Eq. (36)         |
|                                         | 11) SOM saturated conductivity                                 |                                                                                                                                                                                                                          |                  |
| <b>Total soil</b>                       | 12) Soil porosity                                              | $w_{sat} = f_{vom} w_{sat_{om}} + (1 - f_{vom}) w_{sat_{ms}}$                                                                                                                                                            | Eq. (18)         |
|                                         | 13) Soil pore-size index                                       | $b = f_{vom} b_{om} + (1 - f_{vom}) b_{ms}$                                                                                                                                                                              | Eq. (4)          |
|                                         | 14) Soil air-entry potential                                   | $\psi_{sat} = f_{vom} \psi_{sat_{om}} + (1 - f_{vom}) \psi_{sat_{ms}}$                                                                                                                                                   | Eq. (4)          |
|                                         | 15) Soil saturated conductivity                                | $k_{sat} = (k_{sat_{om}})^{f_{vom}} (k_{sat_{ms}})^{1-f_{vom}}$                                                                                                                                                          | Eq. (5)          |
|                                         | 16) Soil volumetric heat capacity                              | $C_{sv} = [c_{om}^{(e)} \rho_{s_{om}} f_{vom} + c_{ms}^{(f)} \rho_{s_{ms}} (1 - f_{vom})] (1 - w_{sat})$<br>$C_{sv} = [c_{om}^{(e)} \rho_{s_{om}} f_{vom}^s + c_{ms}^{(f)} \rho_{s_{ms}} (1 - f_{vom}^s)] (1 - w_{sat})$ | Eq. (46)<br>(41) |
|                                         | 17) Dry thermal conductivity                                   | $\lambda_{dry} = \left[ \frac{\sqrt{\lambda_{dry_{om}}^{(g)}} \lambda_{dry_{ms}}}{(1 - f_{vom}) \sqrt{\lambda_{dry_{om}} + f_{vom} \sqrt{\lambda_{dry_{ms}}}}} \right]^2$ ( <a href="#">Nielson and Rogers, 1982</a> )   | Eq. (7)          |
|                                         |                                                                |                                                                                                                                                                                                                          |                  |

<sup>(a)</sup>  $\rho_{clay} = 2761 \text{ kg.m}^{-3}$ , <sup>(b)</sup>  $\rho_{sand} = 2656 \text{ kg.m}^{-3}$ , <sup>(c)</sup>  $\rho_{silt} = 2692 \text{ kg.m}^{-3}$ , <sup>(d)</sup>  $r_{b_{om}} = \rho_{b_{om}} / 1000$ , <sup>(e)</sup>  $c_{om} = 1972 \text{ J.kg}^{-1}.\text{K}^{-1}$ , <sup>(f)</sup>  $c_{ms} = 733 \text{ J.kg}^{-1}.\text{K}^{-1}$ , <sup>(g)</sup>  $\lambda_{dry_{om}} = 0.05 \text{ W.m}^{-1}.\text{K}^{-1}$ , <sup>(h)</sup>  $\lambda_{s_{om}} = 0.25 \text{ W.m}^{-1}.\text{K}^{-1}$
